# Supplementary material for: Tracking changes and preventing loss in critical tiger habitat
Source: PubMed Central journal article supplement — Sci Adv. 2016 Apr 1;2(4):e1501675. doi: 10.1126/sciadv.1501675 (PMC4820387; doi:10.1126/sciadv.1501675), 2016-04-01
Supplement: 1501675_SM.pdf [file 1501675_SM.pdf]

## Supplementary Materials for

### Tracking changes and preventing loss in critical tiger habitat

Anup R. Joshi, Eric Dinerstein, Eric Wikramanayake, Michael L. Anderson, David Olson, Benjamin S. Jones, John Seidensticker, Susan Lumpkin, Matthew C. Hansen, Nigel C. Sizer, Crystal L. Davis, Suzanne Palminteri, Nathan R. Hahn

Published 1 April 2016, *Sci. Adv.* **2**, e1501675 (2016)  
DOI: 10.1126/sciadv.1501675

#### The PDF file includes:

- Fig. S1. Nine forest corridors connecting core tiger reserves across four Tiger Conservation Landscapes (TCLs) in the Terai Arc Landscape, Nepal.
- Fig. S2. Zoomed-in images that show forest loss and gain in nine forest corridors connecting core tiger reserves in the Terai Arc Landscape, Nepal.
- Fig. S3. Forest loss (in square kilometers) and percentage of forest loss between 2001 and 2014 in 15 Tiger Conservation Landscapes with highest forest loss, including nine priority landscapes for doubling wild tiger populations.
- Fig. S4. Forest loss in priority Tiger Conservation Landscapes for doubling wild tiger populations, between 2001 and 2014.
- Table S1. Forest loss in Tiger Conservation Landscapes ( $n = 76$ ) and associated protected areas ( $n = 434$ ).
- Table S2. Tiger Conservation Landscapes overlapping industrial plantations.
- Table S3. Forest loss and gain in the forest corridors of the Terai Arc Landscape between 2001 and 2014.
- Table S4. Error matrices (in terms of sample counts) for forest and forest loss maps [Hansen *et al.* (13), version 1.2].
- Table S5. Difference between mapped area and sample estimates of forest and forest loss between 2001 and 2014 for Tiger Conservation Landscapes.

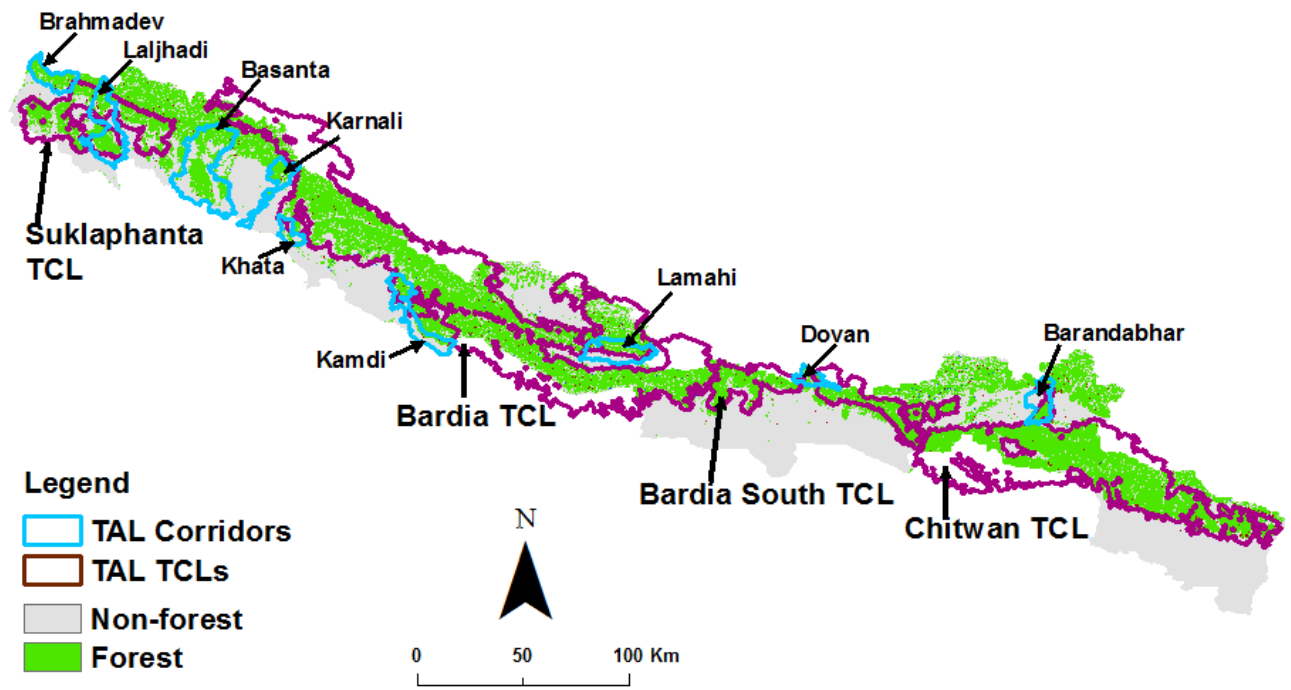

fig. S1. Nine forest corridors connecting core tiger reserves across four Tiger Conservation Landscapes (TCLs) in the Terai Arc Landscape, Nepal.

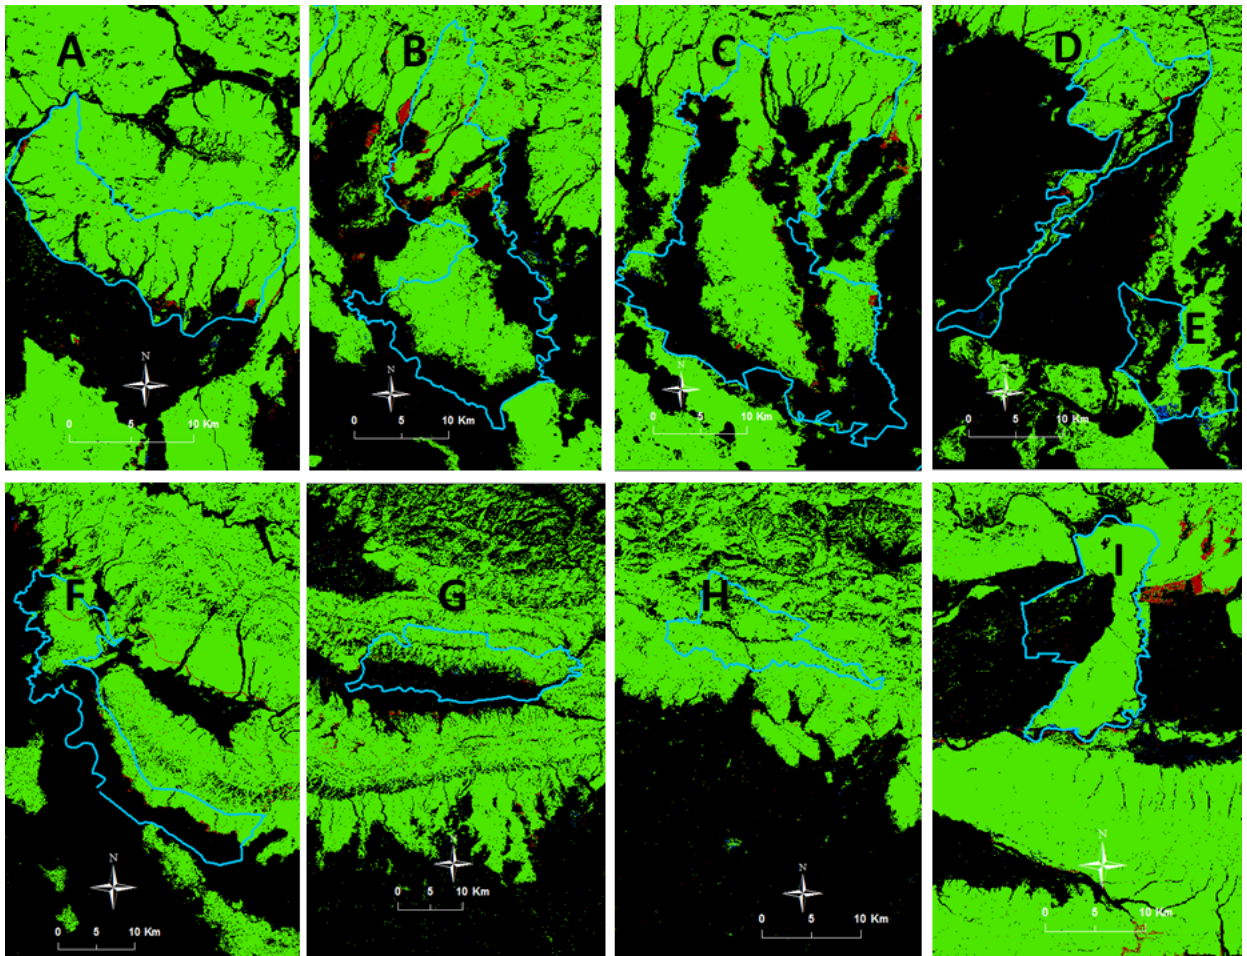

TAL Corridors
  Forest Loss
  Forest Gain
  Forest
  Non-forest

**fig. S2. Zoomed-in images that show forest loss and gain in nine forest corridors connecting core tiger reserves in Terai Arc Landscape, Nepal. Each corridor map has its own scale.**

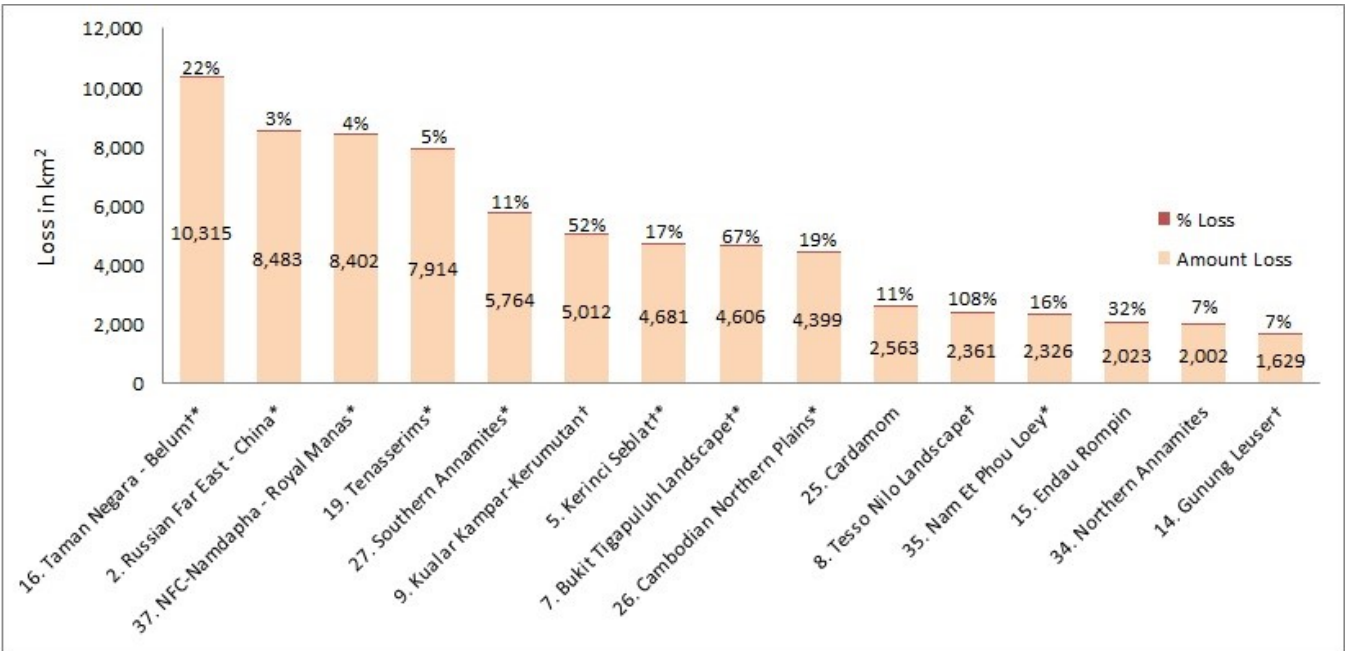

**fig. S3. Forest loss (in square kilometers) and percentage of forest loss between 2001 and 2014 in 15 Tiger Conservation Landscapes with highest forest loss, including nine priority landscapes for doubling wild tiger populations.**

\* Priority Tiger Conservation Landscapes for doubling wild tiger populations

† Tiger Conservation Landscapes overlapping oil palm concessions

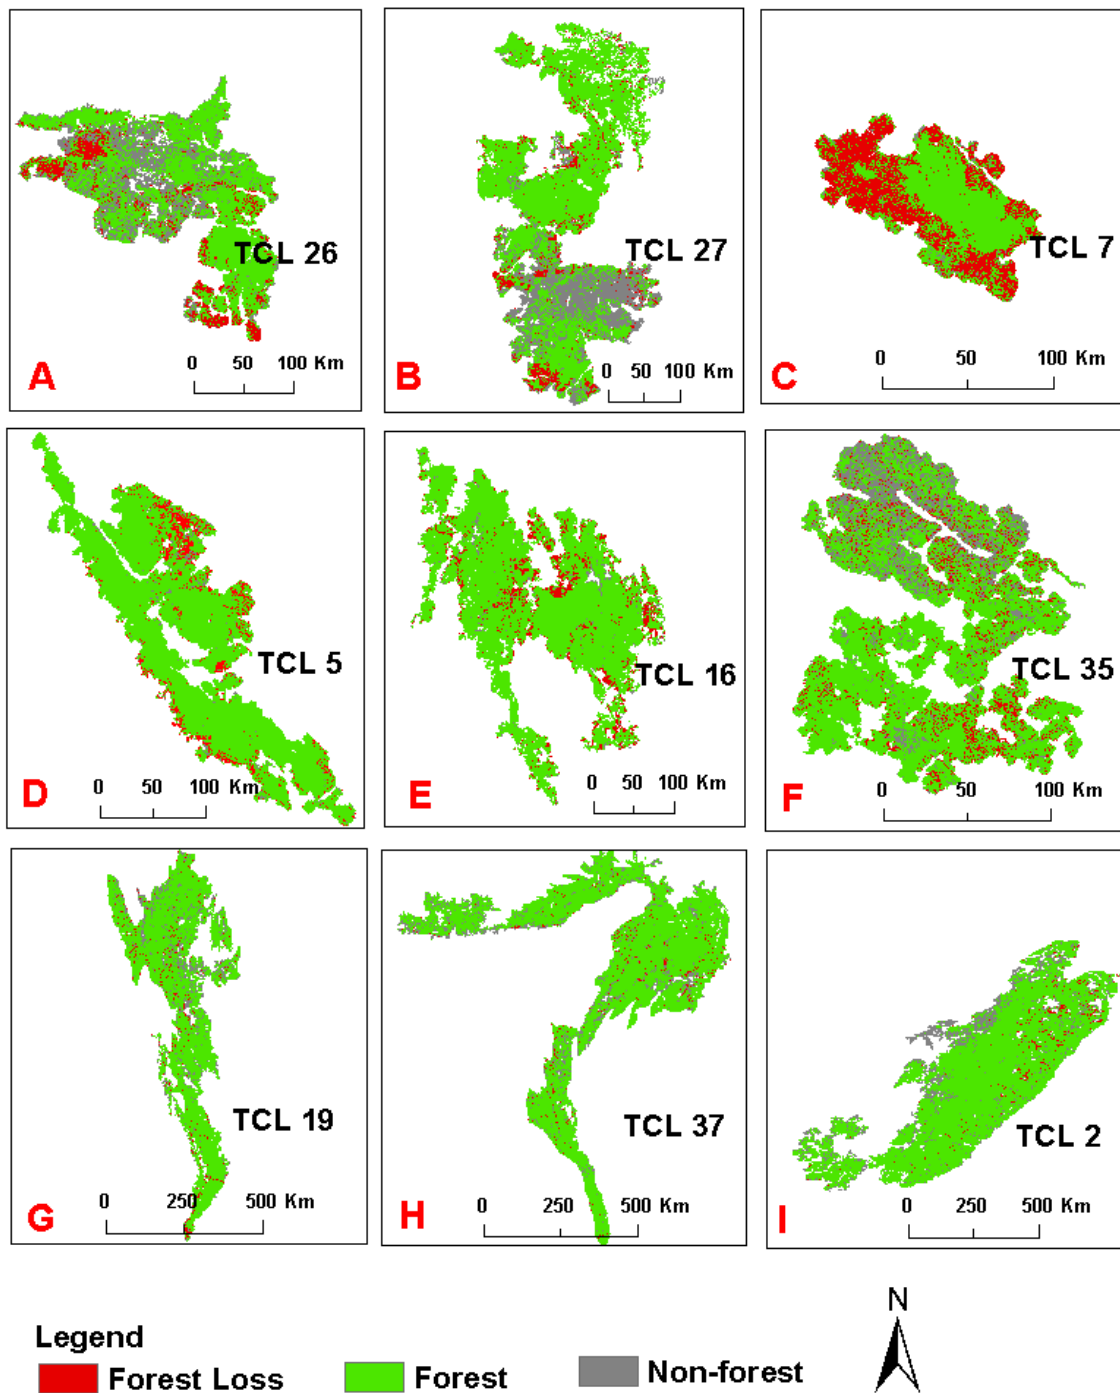

**fig. S4. Forest loss in priority Tiger Conservation Landscapes for doubling wild tiger populations, between 2001 and 2014.** Forest loss in these nine landscapes could support 375 tigers (Table S1). **A)** Cambodian Northern Plains (Cambodia, Laos, Thailand), **B)** Southern Annamites (Cambodia, Laos, Vietnam), **C)** Bukit Tigapuluh Landscape (Indonesia), **D)** Kerinci Seblat (Indonesia), **E)** Taman Negara – Belum (Malaysia, Thailand), **F)** Nam Et Phou Louey (Laos, Vietnam), **G)** Tenasserims (Myanmar, Thailand), **H)** Northern Forest Complex – Namdapha – Royal Manas (Bhutan, India, Myanmar), **I)** Russian Far East – China (Russia, China).

**Table S1. Forest loss in Tiger Conservation Landscapes ( $n = 76$ ) and associated protected areas ( $n = 434$ ).** Tiger Conservation Landscapes identified as essential to doubling tiger populations by 2022 (Tx2) are in bold font. Tiger Conservation Landscapes in the Terai Arc Landscape are marked with ‡.

| <b>ID</b> | <b>Tiger Conservation Landscape</b>                                              | <b>Forest Loss in Tiger Conservation Landscape (km<sup>2</sup>)</b> | <b>Forest Loss in Protected Areas (km<sup>2</sup>)</b> | <b>Number of Tigers Reduced based on Forest Loss</b> | <b>Size of Tiger Conservation Landscape (km<sup>2</sup>)</b> |
|-----------|----------------------------------------------------------------------------------|---------------------------------------------------------------------|--------------------------------------------------------|------------------------------------------------------|--------------------------------------------------------------|
| 16        | <b>Taman Negara – Belum (Malaysia, Thailand)</b>                                 | <b>10,315 ± 2,933</b>                                               | <b>6,30 ± 180</b>                                      | <b>14</b>                                            | <b>49,181</b>                                                |
| 2         | <b>Russian Far East – China (Russia, China)</b>                                  | <b>8,483 ± 2,412</b>                                                | <b>1,207 ± 344</b>                                     | <b>5</b>                                             | <b>269,983</b>                                               |
| 37        | <b>Northern Forest Complex - Namdapha - Royal Manas (Bhutan, India, Myanmar)</b> | <b>8,403 ± 2,389</b>                                                | <b>974 ± 277</b>                                       | <b>7</b>                                             | <b>237,820</b>                                               |
| 19        | <b>Tenasserims (Myanmar, Thailand)</b>                                           | <b>7,914 ± 2,250</b>                                                | <b>1,439 ± 409</b>                                     | <b>33</b>                                            | <b>162,726</b>                                               |
| 27        | <b>Southern Annamites (Cambodia, Laos, Vietnam)</b>                              | <b>5,765 ± 1,639</b>                                                | <b>2,541 ± 723</b>                                     | <b>58</b>                                            | <b>61,252</b>                                                |
| 9         | Kualar Kampar-Kerumutan (Indonesia)                                              | 5,012 ± 1,425                                                       | 33 ± 10                                                | 1                                                    | 9,835                                                        |
| 5         | <b>Kerinci Seblat (Indonesia)</b>                                                | <b>4,682 ± 1,331</b>                                                | <b>1,521 ± 433</b>                                     | <b>35</b>                                            | <b>28,162</b>                                                |
| 7         | <b>Bukit Tigapuluh Landscape (Indonesia)</b>                                     | <b>4,607 ± 1,310</b>                                                | <b>2,259 ± 643</b>                                     | <b>51</b>                                            | <b>7,106</b>                                                 |
| 26        | <b>Cambodian Northern Plains (Cambodia, Laos, Vietnam)</b>                       | <b>4,400 ± 1,251</b>                                                | <b>2,296 ± 643</b>                                     | <b>174</b>                                           | <b>26,835</b>                                                |
| 25        | Cardamom's (Cambodia)                                                            | 2,564 ± 729                                                         | 10 ± 3                                                 | 0                                                    | 26,345                                                       |
| 8         | Tesso Nilo Landscape (Indonesia)                                                 | 2,361 ± 671                                                         | 122 ± 35                                               | 3                                                    | 2,332                                                        |
| 35        | <b>Nam Et Phou Louey (Laos, Vietnam)</b>                                         | <b>2,327 ± 662</b>                                                  | <b>256 ± 73</b>                                        | <b>6</b>                                             | <b>17,866</b>                                                |
| 15        | Endau Rompin (Malaysia)                                                          | 2,024 ± 576                                                         | 7 ± 2                                                  | 0                                                    | 6,505                                                        |
| 34        | Northern Annamites (Laos)                                                        | 2,003 ± 570                                                         | 3 ± 1                                                  | 0                                                    | 28,826                                                       |
| 14        | Gunung Leuser (Indonesia)                                                        | 1,630 ± 464                                                         | 8 ± 3                                                  | 0                                                    | 22,319                                                       |
| 21        | Phu Miang - Phu Thong (Thailand)                                                 | 895 ± 255                                                           | 3 ± 1                                                  | 0                                                    | 16,273                                                       |

|           |                                                 |                  |                |          |               |
|-----------|-------------------------------------------------|------------------|----------------|----------|---------------|
| 6         | Bukit Rimbang Baling<br>(Indonesia)             | 618 ± 176        | 8 ± 3          | 0        | 4,395         |
| <b>38</b> | <b>Kaziranga –<br/>Garampani (India)</b>        | <b>501 ± 143</b> | <b>36 ± 11</b> | <b>4</b> | <b>7,514</b>  |
| 55        | Indravati (India)                               | 500 ± 142        | 2 ± 1          | 0        | 44,238        |
| 28        | Cat Tien<br>(Vietnam)                           | 492 ± 140        | 4 ± 2          | 0        | 3,359         |
| 30        | Kon Ka Kinh<br>(Vietnam)                        | 455 ± 130        | 3 ± 1          | 0        | 6,389         |
| <b>31</b> | <b>Yokdon<br/>(Vietnam)</b>                     | <b>414 ± 118</b> | <b>0 ± 0</b>   | <b>0</b> | <b>1,787</b>  |
| 4         | Bukit Balai Rejang –<br>Selatan (Indonesia)     | 400 ± 114        | 7 ± 2          | 0        | 3,884         |
| 11        | Bukit Barisan South<br>(Indonesia)              | 375 ± 107        | 0              | 0        | 2,890         |
| 36        | Nam Ha (Laos)                                   | 298 ± 85         | 7 ± 2          | 0        | 3,217         |
| 18        | Khlong Saeng<br>(Thailand)                      | 269 ± 77         | 0              | 0        | 4,816         |
| 10        | Berbak<br>(Indonesia)                           | 257 ± 74         | 3 ± 1          | 0        | 2,543         |
| 3         | Bukit Barisan Selatan<br>South (Indonesia)      | 234 ± 67         | 0              | 0        | 2,107         |
| 17        | Krau<br>(Malaysia)                              | 210 ± 60         | 3 ± 1          | 0        | 1,248         |
| 68        | Western Ghats -<br>Sharavathi Valley<br>(India) | 203 ± 58         | 2 ± 1          | 0        | 321           |
| 12        | Rimbo Panti-Batang<br>Gadis West (Indonesia)    | 177 ± 51         | 10 ± 3         | 0        | 1,486         |
| 33        | Hin Nam Ho<br>(Laos)                            | 137 ± 39         | 0              | 0        | 2,727         |
| <b>50</b> | <b>Kanha – Phen<br/>(India)</b>                 | <b>82 ± 24</b>   | <b>2 ± 1</b>   | <b>0</b> | <b>10,598</b> |
| <b>44</b> | <b>Corbett – Sonanadi<br/>(India)</b>           | <b>81 ± 23</b>   | <b>3 ± 1</b>   | <b>0</b> | <b>5,996</b>  |
| <b>42</b> | <b>Bardia‡<br/>(Nepal)</b>                      | <b>66 ± 19</b>   | <b>14 ± 4</b>  | <b>1</b> | <b>6,777</b>  |
| 64        | Periyar – Megamala<br>(India)                   | 62 ± 18          | 2 ± 1          | 0        | 5,978         |
| <b>24</b> | <b>Thap Lan - Pang Sida<br/>(Thailand)</b>      | <b>57 ± 17</b>   | <b>51 ± 15</b> | <b>1</b> | <b>4,445</b>  |
| <b>54</b> | <b>Andhari – Tadoba<br/>(India)</b>             | <b>44 ± 13</b>   | <b>0</b>       | <b>0</b> | <b>3,680</b>  |
| 13        | Sibologa<br>(Indonesia)                         | 44 ± 13          | 19 ± 6         | 1        | 1,292         |
| <b>40</b> | <b>Chitwan‡<br/>(Nepal)</b>                     | <b>41 ± 12</b>   | <b>19 ± 6</b>  | <b>2</b> | <b>4,055</b>  |
| 65        | Anamalai-<br>Parambikulam (India)               | 29 ± 9           | 2 ± 1          | 0        | 3,071         |
| 22        | Phu Khieo (Thailand)                            | 23 ± 7           | 0              | 0        | 5,760         |

|           |                                                                         |               |               |          |               |
|-----------|-------------------------------------------------------------------------|---------------|---------------|----------|---------------|
| 29        | Bi Dup-Nui Ba<br>(Vietnam)                                              | 23 ± 7        | 0             | 0        | 1,660         |
| 56        | Sunabeda-Udanti<br>(India)                                              | 18 ± 5        | 2 ± 1         | 0        | 2,287         |
| <b>23</b> | <b>Khao Yai<br/>(Thailand)</b>                                          | <b>16 ± 5</b> | <b>12 ± 4</b> | <b>0</b> | <b>2,253</b>  |
| <b>43</b> | <b>Suklaphanta‡<br/>(Nepal)</b>                                         | <b>15 ± 4</b> | <b>3 ± 1</b>  | <b>0</b> | <b>1,144</b>  |
| <b>53</b> | <b>Pench<br/>(India)</b>                                                | <b>11 ± 4</b> | <b>0</b>      | <b>0</b> | <b>2,918</b>  |
| 59        | Palamau<br>(India)                                                      | 10 ± 3        | 0             | 0        | 3,209         |
| 63        | Shendurney<br>(India)                                                   | 10 ± 3        | 2 ± 1         | 0        | 603           |
| 32        | Xe Bang Nouan<br>(Laos)                                                 | 8 ± 3         | 0             | 0        | 657           |
| 69        | Dandeli – Anshi<br>(India)                                              | 8 ± 3         | 0             | 0        | 2,316         |
| <b>51</b> | <b>Pachmarhi - Satpura<br/>– Bori (India)</b>                           | <b>7 ± 2</b>  | <b>2 ± 1</b>  | <b>0</b> | <b>4,924</b>  |
| <b>41</b> | <b>Bardia South ‡<br/>(Nepal)</b>                                       | <b>7 ± 2</b>  | <b>0</b>      | <b>0</b> | <b>499</b>    |
| <b>58</b> | <b>Simlipal<br/>(India)</b>                                             | <b>7 ± 2</b>  | <b>7 ± 2</b>  | <b>0</b> | <b>2,412</b>  |
| 71        | Radhanagari<br>(India)                                                  | 7 ± 2         | 0             | 0        | 2,945         |
| 20        | Salak-Phra<br>(Thailand)                                                | 6 ± 2         | 0             | 0        | 647           |
| <b>1</b>  | <b>Heilongjiang<br/>(China)</b>                                         | <b>6 ± 2</b>  | <b>0</b>      | <b>0</b> | <b>1,315</b>  |
| 57        | Satkosia-Gorge<br>(India)                                               | 4 ± 2         | 0             | 0        | 2,699         |
| <b>39</b> | <b>Sundarbans<br/>(Bangladesh, India)</b>                               | <b>2 ± 1</b>  | <b>2 ± 1</b>  | <b>0</b> | <b>5,304</b>  |
| <b>45</b> | <b>Rajaji Minor<br/>(India)</b>                                         | <b>2 ± 1</b>  | <b>2 ± 1</b>  | <b>0</b> | <b>1,044</b>  |
| <b>66</b> | <b>Western<br/>Ghats:Bandipur -<br/>Khudrenukh –<br/>Bhadra (India)</b> | <b>2 ± 1</b>  | <b>2 ± 1</b>  | <b>1</b> | <b>1,8973</b> |
| 61        | Nagarjunasagar South<br>(India)                                         | 0             | 0             | 0        | 1,699         |
| 49        | Bandhavgarh –<br>Panpatha (India)                                       | 0             | 0             | 0        | 2,020         |
| 72        | Chandoli (India)                                                        | 0             | 0             | 0        | 1,682         |
| <b>46</b> | <b>Rajaji Major (India)</b>                                             | <b>0</b>      | <b>0</b>      | <b>0</b> | <b>322</b>    |
| 47        | Panna East (India)                                                      | 0             | 0             | 0        | 1,390         |
| 74        | Purna (India)                                                           | 0             | 0             | 0        | 1,002         |
| <b>52</b> | <b>Melghat (India)</b>                                                  | <b>0</b>      | <b>0</b>      | <b>0</b> | <b>2,398</b>  |
| 76        | Shoolpaneswar (India)                                                   | 0             | 0             | 0        | 511           |



|    |                                         |   |   |   |     |
|----|-----------------------------------------|---|---|---|-----|
| 70 | Dandeli North (India)                   | 0 | 0 | 0 | 517 |
| 48 | Panna West (India)                      | 0 | 0 | 0 | 539 |
| 62 | Nagarjunasagar North (India)            | 0 | 0 | 0 | 915 |
| 67 | Biligiri Range                          | 0 | 0 | 0 | 278 |
| 73 | Mahabaleshwar Landscape – South (India) |   |   |   | 344 |
| 60 | Painganga (India)                       | 0 | 0 | 0 | 442 |
| 75 | Mahabaleshwar Landscape – North (India) | 0 | 0 | 0 | 406 |

**Table S2. Tiger Conservation Landscapes overlapping industrial plantations.**

| ID | Tiger Conservation Landscape  | Plantations (km <sup>2</sup> ) |
|----|-------------------------------|--------------------------------|
| 10 | Berbek                        | 101                            |
| 4  | Bukit Balai Rejang - Selatan  | 47                             |
| 3  | Bukit Barisan Selatan South   | 2,054                          |
| 11 | Bukit Barisan South           | 227                            |
| 6  | Bukit Rimbang Baling          | 1,994                          |
| 7  | Bukit Tigapuluh Landscape*    | 1,634                          |
| 15 | Endau Rompin                  | 3,260                          |
| 14 | Gunung Leuser                 | 114                            |
| 5  | Kerinci-Seblat*               | 115                            |
| 17 | Krau                          | 69                             |
| 9  | Kualar Kampar-Kerumutan       | 551                            |
| 12 | Rimbo Panti-Batang Gadis West | 1,084                          |
| 16 | Taman Negara – Belum*         | 6,339                          |
| 8  | Tesso Nilo Landscape          | 139                            |

\* Priority Tiger Conservation Landscapes for doubling wild tiger populations

**Table S3. Forest loss and gain in the forest corridors of Terai Arc Landscape between 2001 and 2014.** These corridors link forest in southern Nepal and northwestern India.

| Corridor name | Forest loss (km <sup>2</sup> ) | Forest gain (km <sup>2</sup> ) | Area (km <sup>2</sup> ) |
|---------------|--------------------------------|--------------------------------|-------------------------|
| Laljhadhi     | 5.7 ± 1.59                     | 0.52 ± 0.1                     | 354.68                  |
| Basanta       | 5.24 ± 1.46                    | 1.23 ± 0.23                    | 652.36                  |
| Kamdi         | 2.9 ± 0.81                     | 0.43 ± 0.08                    | 254.40                  |
| Brahmadev     | 2.36 ± 0.66                    | 0.55 ± 0.1                     | 160.32                  |
| Lamaha        | 2.19 ± 0.61                    | 1.34 ± 0.25                    | 243.79                  |
| Dovan         | 1.39 ± 0.39                    | 0.21 ± 0.04                    | 79.58                   |
| Karnali       | 1.26 ± 0.35                    | 0.67 ± 0.13                    | 148.94                  |
| Barandabhar   | 0.52 ± 0.15                    | 0.51 ± 0.1                     | 162.56                  |
| Khata         | 0.16 ± 0.05                    | 2.2 ± 0.4                      | 80.62                   |

**Table S4. Error matrices (in terms of sample counts) for forest and forest loss maps [Hansen *et al.* (13), version 1.2].** Map categories are rows and reference categories are columns. Accuracy measures are presented with a 95% confidence interval.

| Class       | Forest |       |       | User's       | Producer's   | Overall      |
|-------------|--------|-------|-------|--------------|--------------|--------------|
|             | Forest | Loss  | Total |              |              |              |
| Forest      | 0.917  | 0.025 | 0.942 | 0.97 ± 0.031 | 0.99 ± 0.021 | 0.93 ± 0.070 |
| Forest Loss | 0.006  | 0.052 | 0.058 | 0.89 ± 0.003 | 0.67 ± 0.021 |              |
| Total       | 0.923  | 0.076 | 1.0   |              |              |              |

**Table S5. Difference between mapped area and sample estimates of forest and forest loss between 2001 and 2014 for Tiger Conservation Landscapes.**

|                                                  | Area (km <sup>2</sup> ) |             |
|--------------------------------------------------|-------------------------|-------------|
|                                                  | Forest                  | Forest Loss |
| Mapped area (Hansen et al 2013, V1.2)            | 979,593                 | 60,429      |
| Sample estimate                                  | 960,426                 | 79,596      |
|                                                  | ± 22,630                | ± 22,630    |
| 95% Confidence interval (sample estimates)       | (2.4%)                  | (28.4%)     |
| Difference between mapped area & sample estimate | -2.0%                   | 31.7%       |
